# Supplementary material for: Functional characterization of orbicularis oculi and extraocular muscles
Source: PubMed Central journal article supplement — J Gen Physiol. 2016 May;147(5):395–406. doi: 10.1085/jgp.201511542 (PMC4845688; doi:10.1085/jgp.201511542), 2016-05
Supplement: supp_jgp.201511542_JGP_201511542_sm.pdf [file supp_jgp.201511542_JGP_201511542_sm.pdf]

SUPPLEMENTAL MATERIAL

Sekulic-Jablanovic et al., <http://www.jgp.org/cgi/content/full/jgp.201511542/DC1>

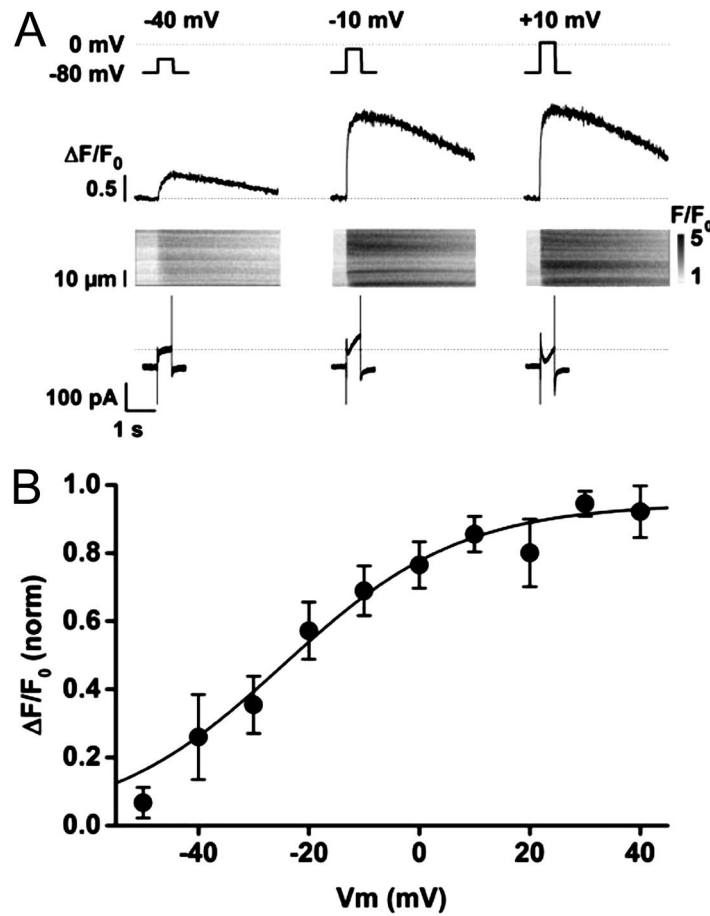

Figure S1. **Voltage dependence of Ca<sup>2+</sup> release in orbicularis oculi-derived myotubes.** Orbicularis oculi-derived myotubes were patch clamped in the whole cell configuration and stimulated to different depolarizing potentials to elicit SR Ca<sup>2+</sup> release as described in Materials and methods. (A) Three examples of stimulated Ca<sup>2+</sup> current (lower traces), line scans imaged in the line scan mode using fluo-3 and corresponding line profiles at -40 mV, -10 mV, and 10 mV, respectively. With increasing membrane depolarization, the amplitude of the triggered Ca<sup>2+</sup> transient increases. (B) The maximal Ca<sup>2+</sup> transient amplitudes at each tested membrane potential are summarized. The ECC of orbicularis oculi myotubes demonstrates a V dependence of Ca<sup>2+</sup> release similar to that observed in quadriceps myotubes (Rokach et al., 2013). At low depolarization, a slow rise in Ca<sup>2+</sup> initiates and leads to a Ca<sup>2+</sup> transient of small amplitude. With increasing depolarization, Ca<sup>2+</sup> release becomes faster and larger, reaching peak amplitudes at about 30 mV. Data are normalized to the respective peak transient amplitude in each cell. The Ca<sup>2+</sup>-voltage relationship was fitted with a Boltzmann function and derived a half-maximal activation potential of approximately  $-25 \pm 5.3$  mV ( $n = 5-6$  cells). Despite rapid coupling, the Ca<sup>2+</sup> removal mechanisms after release appear to be very immature. As seen in the line scan images and previously reported in quadriceps-derived myotubes (Rokach et al., 2013), it takes several seconds for [Ca<sup>2+</sup>]<sub>i</sub> to return to basal levels. Error bars indicate SEM.

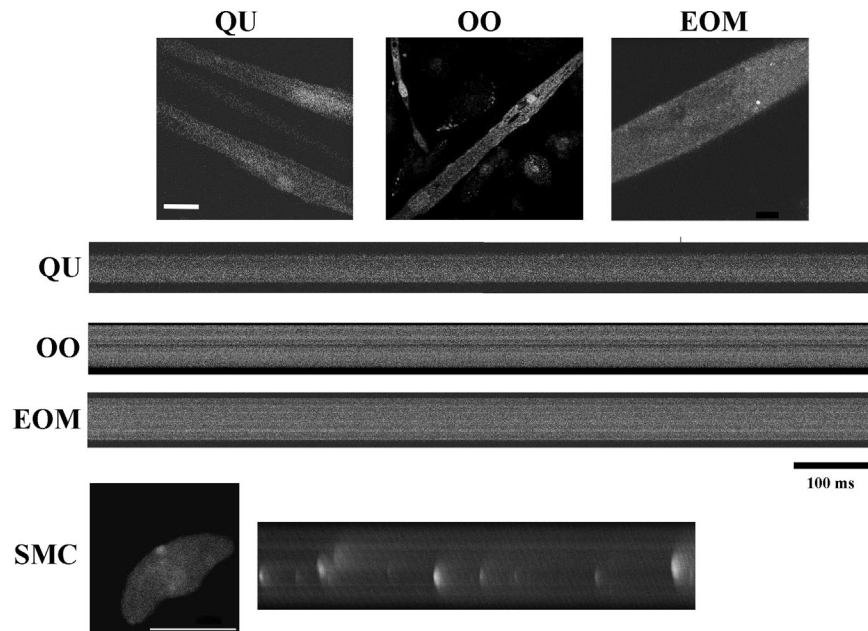

Figure S2. **Human myotubes do not show spontaneous  $\text{Ca}^{2+}$  release events (SPARKS).** (top) Representative photomicrographs of fluo-4-loaded myotubes. (middle) Representative 2.5-s line scan images. (bottom) Positive control showing that using similar settings sparks can be detected in a vascular smooth muscle cell (SMC). Bars, 20  $\mu\text{m}$ . OO, orbicularis oculi; QU, quadriceps.

Table S1. **Sequence of primers used for qPCR**

| Gene name      | Primer sequence (5' to 3')                              |
|----------------|---------------------------------------------------------|
| <i>RYR1</i>    | F: GGACCTCTACGCCCTGTATC<br>R: ATCTCCCGCCTTAGCCATTTT     |
| <i>RYR3</i>    | F: CAGTCCCTATCTGTCAGAGCC<br>R: CATGGCCGTATAACAGGGTCC    |
| <i>CACNA1S</i> | F: TTGCCTACGGCTTCTTATTCCA<br>R: GTTCCAGAATCACGGTGAAGAC  |
| <i>CACNA1C</i> | F: TGATTCCAACGCCACCAATTC<br>R: GAGGAGTCCATAGGCGATTACT   |
| <i>SERCA1</i>  | F: GGTGCTGGCTGACGACAATC<br>R: AAGAGCCAGCCACTGATGAG      |
| <i>CASQ1</i>   | F: CACCCAAGTCAGGGGTACAG<br>R: GTGCCAGCACCTCATACTTCT     |
| <i>JSRP1</i>   | F: TGTGCTCAACAAGTGCCTG<br>R: GCCTGGCCTCGAACTTAG         |
| <i>UTRN</i>    | F: TGAAGGATGTCATGTCCGACC<br>R: GTTGAGGACGTTGACTTGGCT    |
| <i>DMD</i>     | F: GAGACACATGCGGCCTTTATG<br>R: CTCTAACTCCTCAAATGGGTGC   |
| <i>ACTN2</i>   | F: GACATCGTGAACCCCCTAAAC<br>R: CCGCAAAGCGTGGTAGAA       |
| <i>MYH13</i>   | F: GGAGAGAATCGAGGCTCAAATC<br>R: GTCTGGATCATGCCTTTCACATA |

Conditions were as described in Materials and methods. F, forward; R, reverse.

## REFERENCE

Rokach, O., N.D. Ullrich, M. Rausch, V. Mouly, H. Zhou, F. Muntoni, F. Zorzato, and S. Treves. 2013. Establishment of a human skeletal muscle-derived cell line: biochemical, cellular and electrophysiological characterization. *Biochem. J.* 455:169–177. <http://dx.doi.org/10.1042/BJ20130698>
